# Supplementary material
Source: publisher figshare collection journal article supplement (https://frontiersin.figshare.com/ndownloader/files/14994857)
Supplement: Supplementary file [file 14994857]

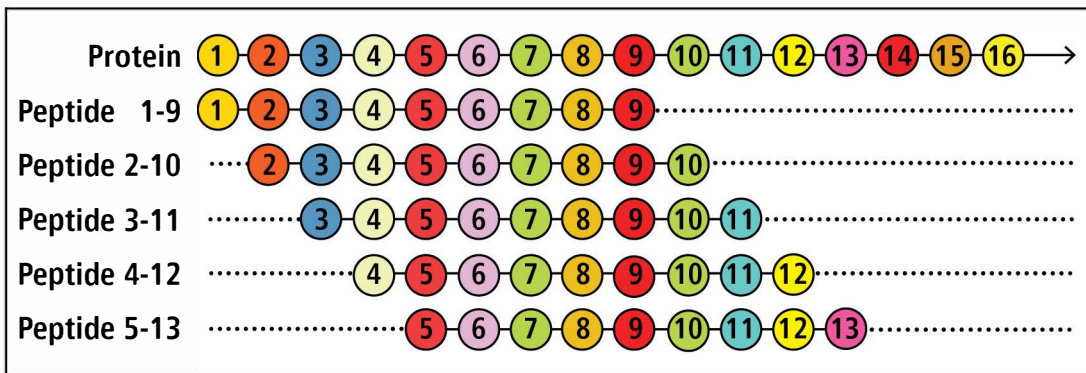

**Supplementary Figure 4.** Illustration of the 9-mer peptide library used for brute force epitope mapping of HCMV pp65. The first sixteen positions of the pp65 amino acid sequence are shown on the top. The individual peptides walk the sequence in steps of single amino acids.
